# Supplementary material for: The In Vitro Anti-Pseudomonal Activity of Cu2+, Strawberry Furanone, Gentamicin, and Lytic Phages Alone and in Combination: Pros and Cons
Source: MDPI journal article supplement (doi:10.3390/ijms22189830), 2021-09-11
Supplement: s1 [file s1]

# The *in vitro* anti-pseudomonal activity of Cu<sup>2+</sup>, strawberry furanone, gentamicin, and lytic phages alone and in combination: pros and cons

Agata Dorotkiewicz-Jach <sup>1,\*</sup>, Pawel Markwitz <sup>1</sup> and Zuzanna Drulis-Kawa <sup>1,\*</sup>

Department of Pathogen Biology and Immunology, Institute of Genetics and Microbiology, University of Wrocław, Przybyszewskiego 63/77, 51-148 Wrocław, Poland

\* Correspondence: zuzanna.drulis-kawa@uwr.edu.pl, Tel.: (+48) 71 375 6290;

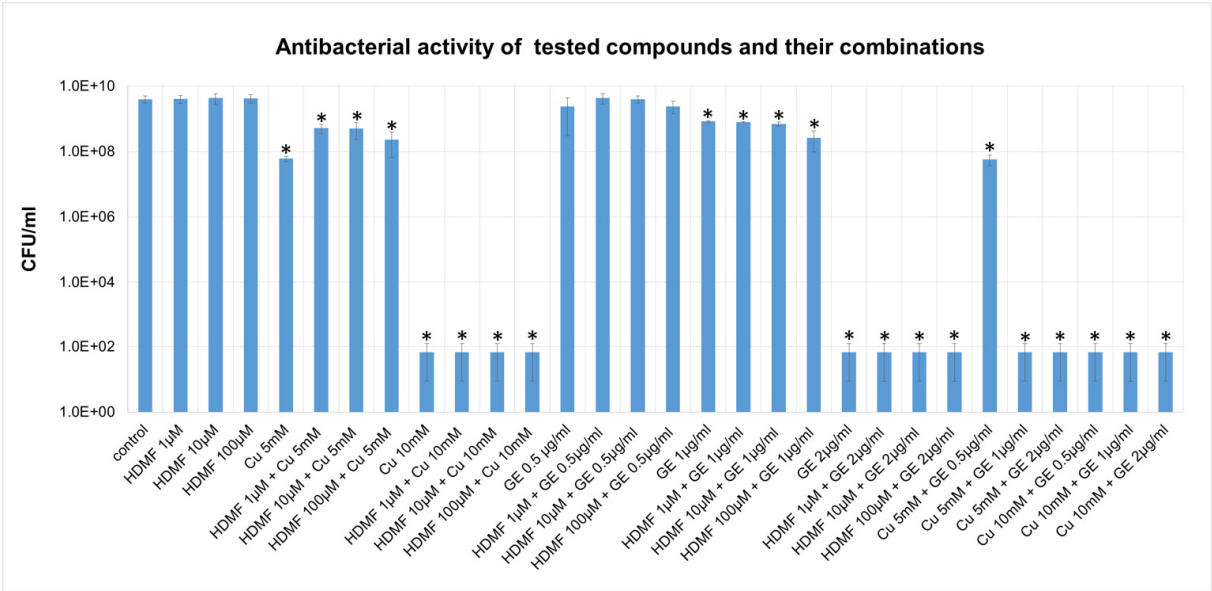

**Figure S1.** The impact of Cu<sup>2+</sup>, HDMF, and GE on 20 h growth of *P. aeruginosa* PAO1; \*statistically significant differences according to PAO1 untreated control (*P*<0.05)

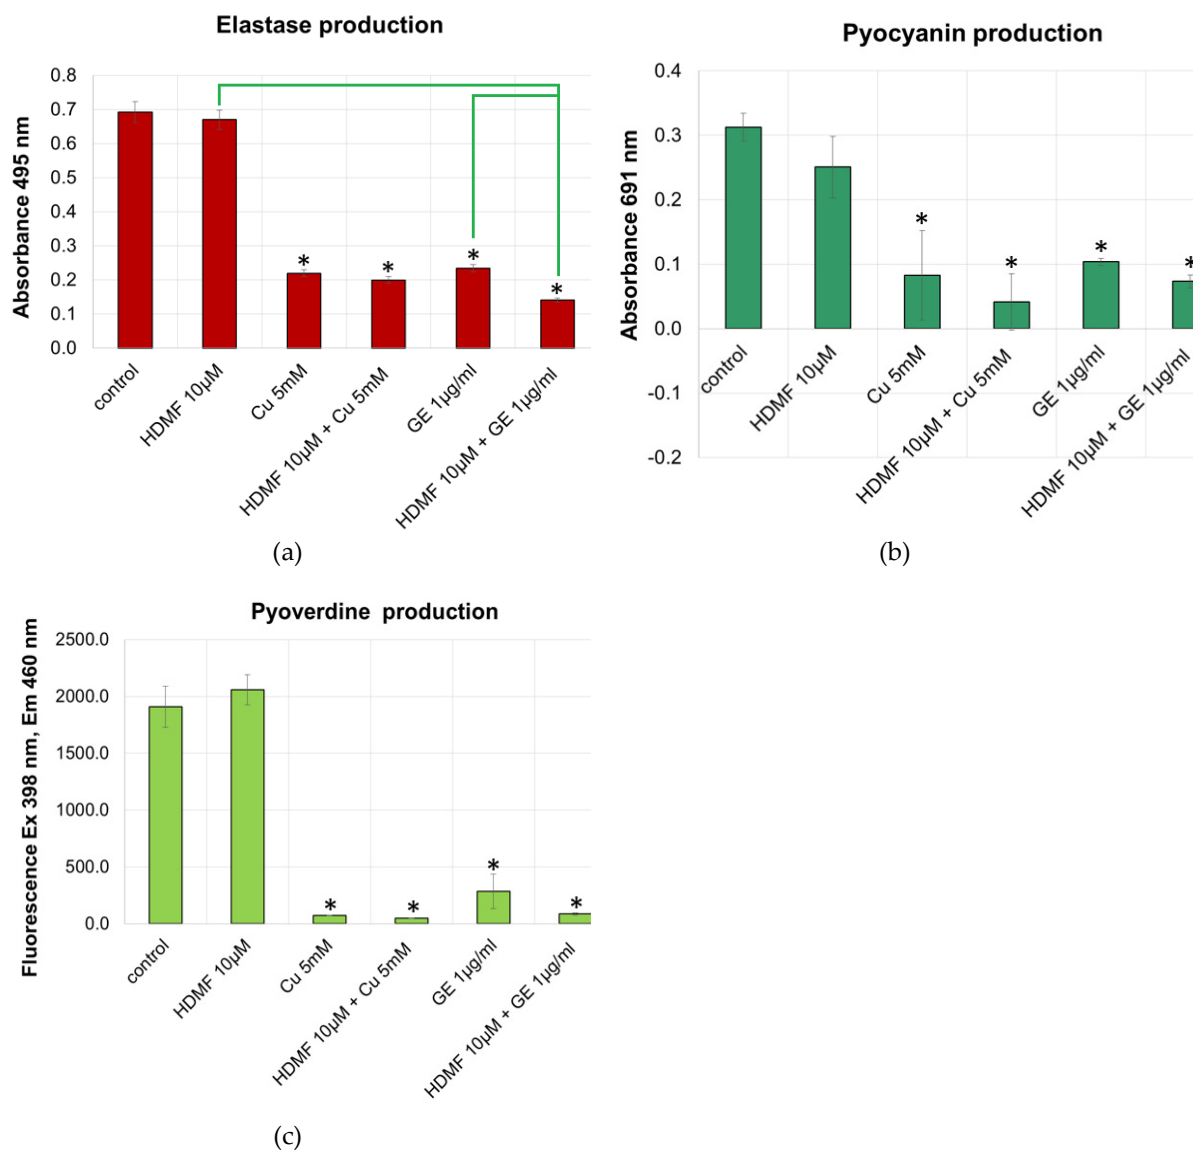

**Figure S2.** The impact of  $\text{Cu}^{2+}$ , HDMF, and GE on *P. aeruginosa* PAO1 virulence determinants production: (a) elastase production; (b) pyocyanin production; (c) pyoverdine production; \*statistically significant differences according to PAO1 control ( $P < 0.05$ ), brackets indicate statistically significant differences between agent combinations ( $P < 0.05$ ).

**Table S1.** Statistical analysis of the significance of differences between tested combinations of antibacterial and anti-virulent components (P<0.05).

|           | Figure 1b           |                  | Figure 1c           |                  | Figure 1d           |                  |
|-----------|---------------------|------------------|---------------------|------------------|---------------------|------------------|
|           | HDMF 10μM GE 1μg/ml | HDMF 10μM Cu 5mM | HDMF 10μM GE 1μg/ml | HDMF 10μM Cu 5mM | HDMF 10μM GE 1μg/ml | HDMF 10μM Cu 5mM |
| HDMF 10μM | Y                   | Y                | Y                   | Y                | Y                   | Y                |
| Cu 5mM    |                     | N                |                     | N                |                     | N                |
| GE 1μg/ml | Y                   |                  | N                   |                  | N                   |                  |

Y-statistically significant with P<0.05; N-statistically not significant;

**Table S2.** The impact of Cu<sup>2+</sup>, HDMF and GE alone and in combination on antibiotic sensitivity patterns of *P. aeruginosa* PAO1.

| Tested antibiotic | PAO1 (control)     | HDMF 10 μM | Cu 5 mM | HDMF 10μM Cu 5mM | GE 0,5 μg/ml | HDMF 10μM GE 0,5μg/ml | Cu 5mM GE 0,5μg/ml |
|-------------------|--------------------|------------|---------|------------------|--------------|-----------------------|--------------------|
| CTX               | 24-25 <sup>S</sup> | -          | -       | -                | -            | -                     | -                  |
| CAZ               | 29-31 <sup>S</sup> | -          | -       | -                | -            | -                     | -                  |
| PIP               | 31-32 <sup>S</sup> | -          | -       | -                | -            | -                     | -                  |
| TZP               | 33-35 <sup>S</sup> | -          | -       | -                | -            | -                     | -                  |
| IPM               | 27-29 <sup>S</sup> | -          | -       | -                | -            | -                     | -                  |
| CN                | 18-19 <sup>S</sup> | -          | -       | -                | -            | -                     | -                  |
| AK                | 24-25 <sup>S</sup> | -          | -       | -                | -            | -                     | -                  |
| CIP               | 36-38 <sup>S</sup> | -          | -       | -                | -            | -                     | -                  |

Numbers indicate diameters of zones of inhibition in mm, S-sensitive according to EUCAST recommendations ([https://www.eucast.org/ast\\_of\\_bacteria/](https://www.eucast.org/ast_of_bacteria/)), – no change observed,

**Table S3.** The starters used for genetic confirmation of phage culture purity.

| Phage | Genome size | GenBank<br>accession<br>number | Starter sequence                 | Melting<br>temperature<br>[°C] |
|-------|-------------|--------------------------------|----------------------------------|--------------------------------|
| KT28  | 66,381 bp   | KP340287                       | (F) CTTCGACGCCGACCGGGAATC        | 60.2                           |
|       |             |                                | (R) GATATGCTACGCCGCCCATTTGTG     | 58.8                           |
| KTN4  | 279,593 bp  | KU521356                       | (F) CTAACCTAAATATATTGACGCTGTATCG | 53.7                           |
|       |             |                                | (R) CCGCTATATACTTGTAGATAACGC     | 54                             |
| LUZ19 | 43,548 bp   | NC_010326                      | (F) CTAACCTAAATATATTGACGCTGTATCG | 62                             |
|       |             |                                | (R) CAACCTCCAGCCAATCTCAATAAAAATT | 57.3                           |
